# Supplementary material for: Receptor-based mechanism of relative sensing and cell memory in mammalian signaling networks
Source: eLife. 2020 Jan 21;9:e50342. doi: 10.7554/eLife.50342 (PMC7046471; doi:10.7554/eLife.50342)
Supplement: Supplementary file 1. — Descriptions and literature-based estimates of rate parameters and species abundances. [file elife-50342-supp1.xlsx]

## Sheet: Table 1A
#	Name	Description	lower bound (log10)	upper bound (log10)	average	std from top 10 fits (log10)	Literature value (log10) including source
					from top 10 fits (log10)
1	C17	Akt (molecules/cell)	5	6	5.4	0.3	5.84 (Chen, Schoeberl et al. 2009)
2	C13	PIP2 (molecules/cell)	8.2	9.2	8.4	0.2	8.7 (see text)
3	C15	PDK1 (molecules/cell)	3	6	4.7	0.8	3-6 (Wang, Weiss et al. 2012)
4	C2	EGFR monomer concentration on cell surface (molecules/cell)	5	6	5	0.03	5.6 (Niepel, Hafner et al. 2013, Shi, Niepel et al. 2016)
5	k1	EGF binding to EGFR monomer ((ng/ml)-1sec-1)	-4.5	-1.8	-1.81	0.02	-2.79 (Chen, Schoeberl et al. 2009),
							-3.56 (Shankaran, Zhang et al. 2012),
							-3.98 (Berkers, van Bergen en Henegouwen et al. 1991)
6	k-1	EGF unbinding from EGFR monomer (sec-1)	-4.5	-0.5	-0.52	0.02	-1.52 (Chen, Schoeberl et al. 2009),
							-2.45 (Berkers, van Bergen en Henegouwen et al. 1991),
							-3.45 (Hendriks 2003)
7	k2	Dimerization of EGFR and EGF:EGFR ((molecules/cell)-1sec-1)	-6.3	-4.3	-6.3	0	-5.47 (Shankaran, Zhang et al. 2012),
							-5.79 (Chen, Schoeberl et al. 2009),
							-4.77 (Hendriks 2003)
8	k-2	Undimerization of EGF:EGFR:EGFR (sec-1)	-1.8	-0.3	-1.25	0.3	-1.3 (Shankaran, Zhang et al. 2012),
							-0.7959 (Chen, Schoeberl et al. 2009),
							-0.77 (Hendriks 2003)
9	kp	Kcat of receptors phosphorylation (sec-1)	-1.5	0.5	0.05	0.2
							-1 (Chen, Schoeberl et al. 2009)
10	kdp	Kcat of receptors dephosphorylation (sec-1)	-1.15	-1.15	-1.15	0
							-1.15 (Kleiman, Maiwald et al. 2011)
11	kdeg*	degradation of active receptors (sec-1)	-4	-2.4	-2.5	0.12	-3.52 (Hendriks 2003),
							-3.39 (Shankaran, Zhang et al. 2012),
							-2.89 (Hendriks, Wiley et al. 2003)
12	kdeg	degradation of inactive receptors (sec-1)	-4.1	-3.1	-3.6	0.06	-3.57 (Shankaran, Zhang et al. 2012)
13	ki	internalization of inactive receptors (sec-1)	-3.9	-2.4	-3.83	0.05	-2.88 (Chen, Schoeberl et al. 2009),
							-2.93 (Shankaran, Zhang et al. 2012),
							-3.38 (Herbst, Opresko et al. 1994)
14	krec	recycling of inactive receptors (sec-1)	-4.8	-2.1	-3.56	0.1	-2.63 (Herbst, Opresko et al. 1994),
							-2.97 (Shankaran, Zhang et al. 2012),
							-4.3 (Chen, Schoeberl et al. 2009)
15	ki*	internalization of activated receptors (sec-1)	-3.4	-2.4	-2.5	0.04
							-2.88 (Chen, Schoeberl et al. 2009)
16	krec*	recycling of activated receptors (sec-1)	-4.8	-2.8	-4.42	0.43	-3.3 (Herbst, Opresko et al. 1994),
							-3.57 (Hendriks 2003),
							-4.3 (Chen, Schoeberl et al. 2009)
17	k5	PIP3:PDK1 complex binding to Akt (*)((molecules/cell)-1sec-1)	-7	-4	-5.73	0.69
18	k-5	PIP3:PDK1:Akt complex unbinding from Akt (sec-1)	-6	-1	-3.5	1.4
19	k6	Kcat of Akt phosphorylation (sec-1)	-3	1	-0.2	1
20	k-3	Kcat of dephosphorylation of PIP3 into PIP2 (sec-1)	-3	1	0.86	0.14
21	k-6	Kcat of Akt dephosphorylation (sec-1)	-3	1	-2.3	0.02
22	k4	PDK1 binding to PIP3 ((molecules/cell)-1sec-1)	-7	-3	-6.7	0.26
23	k-4	PDK1 unbinding from PIP3 (sec-1)	-3	1	0.69	0.33
24	k3	Rp activating PIP2 ((molecules/cell)-1sec-1)	-7	-4	-6.6	0.24
