# Supplementary material for: Receptor-based mechanism of relative sensing and cell memory in mammalian signaling networks
Source: eLife. 2020 Jan 21;9:e50342. doi: 10.7554/eLife.50342 (PMC7046471; doi:10.7554/eLife.50342)
Supplement: Supplementary file 2. [file elife-50342-supp2.xlsx]

## Sheet: Table
#	Variable name	Variable name in the simplified model	description	Localization
1	C1	L	EGF	extracellular space
2	C2	R	EGFR	plasma membrane
3	C3	Ri	EGFR	endosomes
4	C4	LR	EGF:EGFR	plasma membrane
5	C5	LR2	EGF:EGFR:EGFR	plasma membrane
6	C6	LR2i	EGF:EGFR:EGFR	endosomes
7	C7		EGF:EGFR:EGF:EGFR	plasma membrane
8	C8		EGF:EGFR:EGF:EGFR	endosomes
9	C9	LR2*	(EGF:EGFR:EGFR)pp	plasma membrane
10	C10	LR2i*	(EGF:EGFR:EGFR)pp	endosomes
11	C11		(EGF:EGFR:EGF:EGFR)pp	plasma membrane
12	C12		(EGF:EGFR:EGF:EGFR)pp	endosomes
13	C13		PIP2	plasma membrane
14	C14		PIP3	plasma membrane
15	C15		PDK1	Cytoplasm
16	C16		PIP3:PDK1	Cytoplasm
17	C17		Akt	Cytoplasm
18	C18		PIP3:PDK1:Akt	Cytoplasm
19	C19		pAkt	Cytoplasm
20	C20	LRi	EGF:EGFR	endosomes
