# Supplementary material for: Receptor-based mechanism of relative sensing and cell memory in mammalian signaling networks
Source: eLife. 2020 Jan 21;9:e50342. doi: 10.7554/eLife.50342 (PMC7046471; doi:10.7554/eLife.50342)
Supplement: Supplementary file 3. [file elife-50342-supp3.xlsx]

## Sheet: Table
Reaction description	Reaction mechanism	Notes
EGF binding to EGFR					[m]: membrane
					[e]: external
EGF binds to EGFR monomer	EGF[e] + EGFR[m] <--> EGF-EGFR[m]				[c]: cytoplasmic (endosomes)
EGF binds to EGFR dimer	EGF[e] + EGF-EGFR-EGFR[m] <--> EGF-EGF-EGFR-EGFR[m]
EGFR dimerization 1	EGFR[m] + EGF-EGFR[m] <--> EGF-EGFR-EGFR[m]
EGFR dimerization 2	EGF-EGFR[m] + EGF-EGFR[m] <-->EGF-EGF-EGFR-EGFR[m]
EGFR traficking
EGFR delivery to the cell membrane	0 --> EGFR[m]
empty EGFR monomer internalization	EGFR[m] --> EGFR[c]
empty EGFR monomer recycling	EGFR[c] --> EGFR[m]
bound EGFR monomer internalization	EGF-EGFR[m] --> EGF-EGFR[c]
bound EGFR monomer recycling	EGF-EGFR[c] --> EGF-EGFR[m]
EGFR dimer internalization 1	EGF-EGFR-EGFR[m] --> EGF-EGFR-EGFR[c]
EGFR dimer recycling 1	EGF-EGFR-EGFR[c] --> EGF-EGFR-EGFR[m]
EGFR dimer internalization 2	EGF-EGF-EGFR-EGFR[m] --> EGF-EGF-EGFR-EGFR[c]
EGFR dimer recycling 2	EGF-EGF-EGFR-EGFR[c] --> EGF-EGF-EGFR-EGFR[m]
Active EGFR internalization 1	EGF-EGFR-EGFR*[c] --> EGF-EGFR-EGFR*[m]
Active EGFR recycling 1	EGF-EGFR-EGFR*[m] --> EGF-EGFR-EGFR*[c]
active EGFR internalization 2	EGF-EGF-EGFR-EGFR*[m] --> EGF-EGF-EGFR-EGFR*[c]
active EGFR recycling 2	EGF-EGF-EGFR-EGFR*[c] --> EGF-EGF-EGFR-EGFR*[m]
EGFR phosphorylation
EGFR dimer phosphorylation 1 (membrane)	EGF-EGFR-EGFR[m] --> EGF-EGFR-EGFR*[m]
EGFR dimer dephosphorylation 1 (membrane)	EGF-EGFR-EGFR*[m] --> EGF-EGFR-EGFR[m]
EGFR dimer phosphorylation 1 (cytoplasm)	EGF-EGFR-EGFR[c] --> EGF-EGFR-EGFR*[c]
EGFR dimer dephosphorylation 1 (cytoplasm)	EGF-EGFR-EGFR*[c] --> EGF-EGFR-EGFR[c]
EGFR dimer phosphorylation 2 (membrane)	EGF-EGF-EGFR-EGFR[m] --> EGF-EGF-EGFR-EGFR*[m]
EGFR dimer dephosphorylation 2 (membrane)	EGF-EGF-EGFR-EGFR*[m] --> EGF-EGF-EGFR-EGFR[m]
EGFR dimer phosphorylation 2 (cytoplasm)	EGF-EGF-EGFR-EGFR[c] --> EGF-EGF-EGFR-EGFR*[c]
EGFR dimer dephosphorylation 2 (cytoplasm)	EGF-EGF-EGFR-EGFR*[c] --> EGF-EGF-EGFR-EGFR[c]
EGFR degradation
EGFR monomer degradation	EGFR[c] --> 0
bound EGFR monomer degradation	EGF-EGFR[c] --> 0
EGFR dimer degradation 1	EGF-EGFR-EGFR[c] --> 0
EGFR dimer degradation 2	EGF-EGF-EGFR-EGFR[c] --> 0
active EGFR dimer degradation 1	EGF-EGFR-EGFR*[c] --> 0
active EGFR dimer degradation 2	EGF-EGF-EGFR-EGFR*[c] --> 0
Akt activation downstream of EGFR activation
PIP2 phosphorylation	PIP2[m] --> PIP3[m]	Rate proportional to total active EGFR
PIP3 dephosphorylation	PIP3[m] --> PIP2[m]
PIP3 association with PDK1	PIP3[m] + PDK1[m] --> PIP3-PDK1[m]
PIP3-PDK1 complex dissociation	PIP3-PDK1[m] --> PIP3[m] + PDK1[m]
PIP3-PDK1 binding to Akt	Akt[m] + PIP3-PDK1[m] --> Akt-PIP3-PDK1[m]
PIP3-PDK1-Akt complex dissociation	Akt-PIP3-PDK1[m] --> Akt[m] + PIP3-PDK1[m]
Akt phosphorylation	Akt-PIP3-PDK1[m] --> pAkt[m] + PIP3-PDK1[m]
Akt dephosphorylaion	pAkt[m] --> Akt[m]
